# Supplementary material
Source: publisher figshare collection journal article supplement (https://tandf.figshare.com/ndownloader/files/22307106)
Supplement: Supplementary file 1 [file 22307106]

**Demographic Information**

1. Tehsil _________________________
2. Farming Experience (number of years) _________________________
3. Farm Size (number of acres) _________________________
4. Formal education (1= illiterate, 2= Up to middle school, 3 = Up to high school, 4 = professional diploma/vocational training course, 5 = graduate/postgraduate) _____________________________

**Progressive Farming Approach**

1. How frequently do you listen/watch programs or read literature on farming?

آپ کھیتی باڑی سے مطلقہ کتنے پروگرام دیکھتے یا سنتے ہیں یا پھر کوئی لٹریچر پڑھتے ہیں ؟

| 1 | 2 | 3 | 4 | 5 |
| --- | --- | --- | --- | --- |

1. How frequently do you attend meetings with agricultural consultants/extension workers?

آپ زرعی ماہرین یا توسیعی کارکنوں کے ساتھ کتنی بارملاقات کرتے ہیں ؟

| 1 | 2 | 3 | 4 | 5 |
| --- | --- | --- | --- | --- |

1. How frequently do you attend technical training on farming? (examples to be quoted)

آپ کھیتی باڑی سے متعلق تکنیکی تربیت میں کتنی بار شرکت کرتے ہیں؟

| 1 | 2 | 3 | 4 | 5 |
| --- | --- | --- | --- | --- |

1. How frequently do you try new farming technologies? (examples to be quoted)

آپ کس حد تک کاشتکاری میں جدّت لانے کے کوشش کرتے ہیں ؟

| 1 | 2 | 3 | 4 | 5 |
| --- | --- | --- | --- | --- |

1. How frequently do you try farming practices which are not conventionally used in your community?

آپ کتنی بار روایتی طریقہ کاشت سے ہٹ کر کوئی جدید طریقہ کاشت استعمال کرتے ہیں ؟

| 1 | 2 | 3 | 4 | 5 |
| --- | --- | --- | --- | --- |

**Intention**

1. My main goal in farming is to maximize crop production

کاشت کاری میں میرا بنیادی مقصد پیداوار میں اضافہ ہے ؟

| 1 (Strongly disagree) | 2 (Disagree) | 3 (Neutral) | 4 (Agree) | 5 (Strongly agree) |
| --- | --- | --- | --- | --- |

1. I have in mind to store pesticides in a separate storehouse

میں اس بات کا خیال رکھتا ہوں کے کیڑے مارادویات الگ کمرےمیں ذخیرہ ہوں؟

| 1 (Strongly disagree) | 2 (Disagree) | 3 (Neutral) | 4 (Agree) | 5 (Strongly agree) |
| --- | --- | --- | --- | --- |

1. I plan to spray pesticides exactly as recommended by the experts

میں ماہرین کے سفارشات کے مطابق کیڑے مار زہروں کا استعمال کرنے کا ارادہ رکھتا ہوں؟

| 1 (Strongly disagree) | 2 (Disagree) | 3 (Neutral) | 4 (Agree) | 5 (Strongly agree) |
| --- | --- | --- | --- | --- |

1. I plan to reduce pesticide applications in my crops

میں کیڑے مار زہروں کے کم سے کم استعمال کا ارادہ رکھتا ہوں ؟

| 1 (Strongly disagree) | 2 (Disagree) | 3 (Neutral) | 4 (Agree) | 5 (Strongly agree) |
| --- | --- | --- | --- | --- |

**Attitudes**

1. The use of pesticides has acute/chronic effects on human health

کیڑے مار زہروں کے استعمال سے انسانی زندگی پر فوری اور دائمی اثرات مراتب ہوتے ہیں ؟

| 1 (Strongly disagree) | 2 (Disagree) | 3 (Neutral) | 4 (Agree) | 5 (Strongly agree) |
| --- | --- | --- | --- | --- |

1. Pesticide use in agriculture can be harmful to non-target organisms (birds, butterflies, etc.)

زراعت میں کیڑے مار زہروں کا استعمال غیر ہدف شدہ حیاتیات (پرندوں ، تیتلیوں ، وغیرہ) کے لئے نقصان دہ ہوسکتا ہے۔

| 1 (Strongly disagree) | 2 (Disagree) | 3 (Neutral) | 4 (Agree) | 5 (Strongly agree) |
| --- | --- | --- | --- | --- |

1. Recommended use of pesticides is necessary for increasing productivity output

فصلات کی پیداوار میں اضافہ کے لیے کیڑے مار زہروں کا تجویز کردہ استعمال ضروری ہے

| 1 (Strongly disagree) | 2 (Disagree) | 3 (Neutral) | 4 (Agree) | 5 (Strongly agree) |
| --- | --- | --- | --- | --- |

1. Pesticide use in agriculture can lead to environmental degradation

زراعت میں کیڑے مار زہروں کے استعمال سے ماحولیاتی بگاڑ پیدا ہو سکتا ہے

| 1 (Strongly disagree) | 2 (Disagree) | 3 (Neutral) | 4 (Agree) | 5 (Strongly agree) |
| --- | --- | --- | --- | --- |

1. Pesticides should be kept out of reach of children

کیڑے مار زہروں کو بچوں کی پہنچ سے دور رکھنا چاہئے۔

| 1 (Strongly disagree) | 2 (Disagree) | 3 (Neutral) | 1. (Agree) | 5. (Strongly agree) |
| --- | --- | --- | --- | --- |

**Subjective Norms**

1. I follow the practices of the other farmers to control pests

میں نقصان دہ کیڑوں پر قابو پانے کے لئے دوسرے کاشتکاروں کے طریق کار پر عمل کرتا ہوں۔

| 1 (Strongly disagree) | 2 (Disagree) | 3 (Neutral) | 4 (Agree) | 5 (Strongly agree) |
| --- | --- | --- | --- | --- |

1. My friends/fellow farmers discourage me from increasing pesticide use

میرے دوست / ساتھی کسان کیڑے مار زہروں کے حد سے زیادہ استعمال سے حوصلہ شکنی کرتے ہیں۔

| 1 (Strongly disagree) | 2 (Disagree) | 3 (Neutral) | 4 (Agree) | 5 (Strongly agree) |
| --- | --- | --- | --- | --- |

1. Farmers who use more pesticides will also harvest more quantity of products

جوکسان کیڑے مار زہروں کا استعمال کرتے ہیں انکی فصل کی پیداوار زیادہ ہوتی ہے

| 1 (Strongly disagree) | 2 (Disagree) | 3 (Neutral) | 4 (Agree) | 5 (Strongly agree) |
| --- | --- | --- | --- | --- |

1. Farmers who use more pesticides will also harvest better quality of products

جوکسان کیڑے مار زہروں کا استعمال کرتے ہیں انکی فصل کا معیار زیادہ اچھا ہوتا ہے

| 1 (Strongly disagree) | 2 (Disagree) | 3 (Neutral) | 4 (Agree) | 5 (Strongly agree) |
| --- | --- | --- | --- | --- |

1. Agriculture extension workers advise me against the overuse of pesticides

زرعی توسیع کرنے والے کارکن مجھے کیڑےمار زہروں کے حد سے زیادہ استعمال سے بچنے کا مشورہ دیتے ہیں

| 1 (Strongly disagree) | 2 (Disagree) | 3 (Neutral) | 4 (Agree) | 5 (Strongly agree) |
| --- | --- | --- | --- | --- |

1. My close friends confirm the use of pesticides to control pests

میرے قریبی دوست نقصان دہ کیڑوں پر قابو پانے کے لئے کیڑےمار زہروں کے استعمال کی تصدیق کرتے ہیں۔

| 1 (Strongly disagree) | 2 (Disagree) | 3 (Neutral) | 1. (Agree) | 5 (Strongly agree) |
| --- | --- | --- | --- | --- |

**Perceived Behavioral Control**

1. Cultivating crops without pesticide spraying is achievable for me

کیڑے مار زہروں کے استعمال کے بغیر فصلات کے کاشت ممکن ہے

| 1 (Strongly disagree) | 2 (Disagree) | 3 (Neutral) | 4 (Agree) | 5 (Strongly agree) |
| --- | --- | --- | --- | --- |

1. The method of using chemical pesticides is easy

کیڑے مار زہروں کو استعمال کرنے کا طریقہ آسان ہے

| 1 (Strongly disagree) | 2 (Disagree) | 3 (Neutral) | 4 (Agree) | 5 (Strongly agree) |
| --- | --- | --- | --- | --- |

1. If I want to, I can easily put aside pesticide use

اگر میں چاہوں تو کیڑے مار زہروں کا استعمال ترک کر سکتا ہوں

| 1 (Strongly disagree) | 2 (Disagree) | 3 (Neutral) | 4 (Agree) | 5 (Strongly agree) |
| --- | --- | --- | --- | --- |

1. I know of alternate methods to control crop pests

میں فصلات کے نقصان دہ کیڑوں کو تلف کرنے کے متبادل طریقوں سے آگاہ ہوں

| 1 (Strongly disagree) | 2 (Disagree) | 3 (Neutral) | 4 (Agree) | 5 (Strongly agree) |
| --- | --- | --- | --- | --- |

**Moral Norms**

1. Not spraying pesticides gives me the feeling that I am protecting environment

کیڑے مار زہروں کے استعمال نہ کرنے سے مجھے احساس ہوتا ہے کہ میں ماحول کے حفاظت کر رہا ہوں

| 1 (Strongly disagree) | 2 (Disagree) | 3 (Neutral) | 4 (Agree) | 5 (Strongly agree) |
| --- | --- | --- | --- | --- |

1. I feel guilty when I use pesticides (because I may be hurting environment)

میں کیڑے مار زہروں کو استعمال کر کے احساس جرم مے مبتلا ہوتا ہوں

| 1 (Strongly disagree) | 2 (Disagree) | 3 (Neutral) | 4 (Agree) | 5 (Strongly agree) |
| --- | --- | --- | --- | --- |

1. Spraying more than the prescribed amount is not acceptable both legally and morally

کیڑےمار زہروں کا حد سے زیادہ استعمال قانونی اور اخلاقی طورپر قابل قبول نہیں ہے

| 1 (Strongly disagree) | 2 (Disagree) | 3 (Neutral) | 4 (Agree) | 5 (Strongly agree) |
| --- | --- | --- | --- | --- |

1. I feel that I may be hurting the health of my fellow villagers if I spray a lot of pesticides

مجھے لگتا ہےکہ میں کیڑے مار زہروں کے حد سے زیادہ استعمال کے وجہ سے اپنے گاؤں والوں کے صحت کو نقصان دے رہا ہوں

| 1 (Strongly disagree) | 2 (Disagree) | 3 (Neutral) | 4 (Agree) | 5 (Strongly agree) |
| --- | --- | --- | --- | --- |

**Pesticide Knowledge**

1. Pesticide label instructions are important

کیڑے مار زہروں کے بوتل پر درج ہدایات نہایت اہم ہیں

| 1 (Strongly disagree) | 2 (Disagree) | 3 (Neutral) | 4 (Agree) | 5 (Strongly agree) |
| --- | --- | --- | --- | --- |

1. I use pesticide protective equipment before spraying

میں کیڑے مار زہروں کے استعمال سے پہلے حفاظتی سامان کا استعمال کرتا ہوں

| 1 (Strongly disagree) | 2 (Disagree) | 3 (Neutral) | 4 (Agree) | 5 (Strongly agree) |
| --- | --- | --- | --- | --- |

1. Frequent spraying eliminates pests and increases crop productivity

کیڑے مار زہروں کے بار بار استعمال کی وجہ سے نقصان دہ کیڑے تلف اور فصلات کی پیداوارمیں اضافہ ہوتا ہے

| 1 (Strongly disagree) | 2 (Disagree) | 3 (Neutral) | 4 (Agree) | 5 (Strongly agree) |
| --- | --- | --- | --- | --- |

1. I am aware that pesticide spraying can affect the environment

مجھے احساس ہے کہ کیڑے مار زہروں کا استعمال ماحول کو متاثر کرتا ہے

| 1 (Strongly disagree) | 2 (Disagree) | 3 (Neutral) | 4 (Agree) | 5 (Strongly agree) |
| --- | --- | --- | --- | --- |

1. Non-judicious pesticide spraying promotes the development of resistance in crop pests

کیڑے مار زہروں کا غیر متوازن استعمال کیڑوں میں مزاحمت کے نشونما کو فروغ دیتا ہے

| 1 (Strongly disagree) | 2 (Disagree) | 3 (Neutral) | 4 (Agree) | 5 (Strongly agree) |
| --- | --- | --- | --- | --- |
